# Supplementary material for: Water-soluble metal nanoparticles stabilized by plant polyphenols for improving the catalytic properties in oxidation of alcohols
Source: Royal Society of Chemistry journal article supplement (doi:10.1039/c5nr07897k), 2015-11-25
Supplement: c5nr07897k1.pdf [file c5nr07897k1.pdf]

## Supporting Information

### **Water-soluble metal nanoparticles stabilized by plant polyphenols for improving the catalytic properties in oxidation of alcohols**

*H. Mao<sup>a</sup>, J. Ma<sup>a</sup>, Y. Liao<sup>a</sup>, S. L. Zhao<sup>a\*</sup> and F. W. Huo<sup>b\*</sup>*

<sup>a</sup> College of Chemistry and Materials Science, The Engineering Center for the Development of Farmland Ecosystem Service Function, Sichuan Normal University, Chengdu 610068, P.R. China.

<sup>b</sup> Key Laboratory of Flexible Electronics (KLOFE) & Institute of Advanced Materials (IAM), Jiangsu National Synergistic Innovation Center for Advanced Materials (SICAM), Institute of Advanced Materials, Nanjing Tech University (NanjingTech), Nanjing 211816, P.R. China.

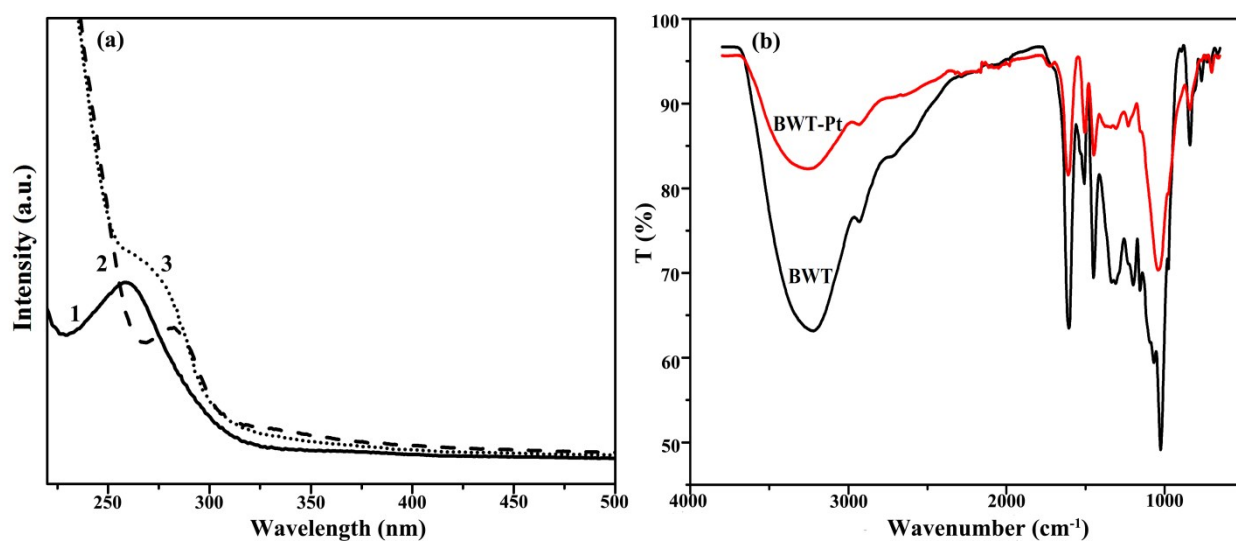

**Fig. S1.** UV-vis and FT-IR spectrum of BWT and BWT-Pt (a: UV-vis spectrum, 1:  $\text{Pt}^{4+}$  solution, 2: BWT-Pt solution, 3: BWT- $\text{Pt}^{4+}$  solution; b: FT-IR spectrum).

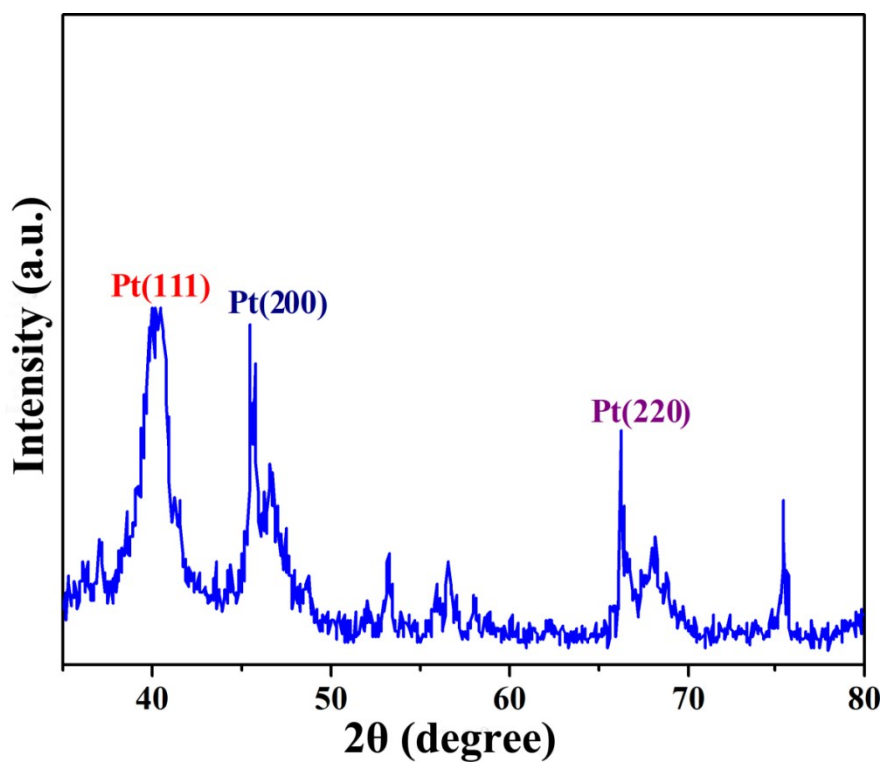

**Fig. S2.** XRD pattern of  $\text{BWT}_{3.75}\text{-Pt}$ .

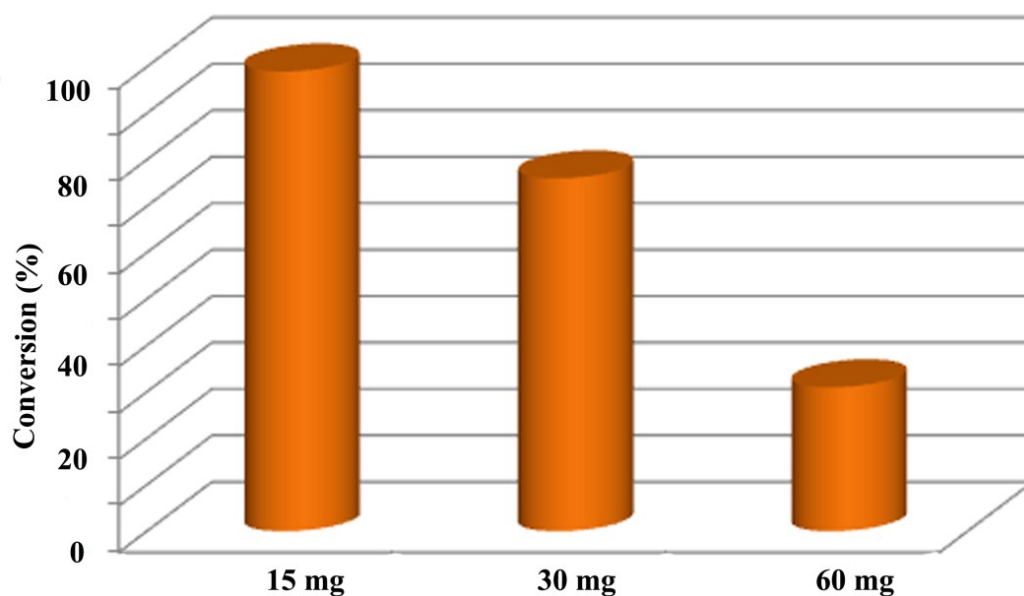

**Fig. S3.** Oxidation of benzyl alcohol using BWT-Pt NPs catalysts with different amount of BWT ( 20  $\mu\text{mol}$  of Pt, 1 mmol of benzyl alcohol, 15 ml of  $\text{H}_2\text{O}$ , 50°C, 0.5 mmol of base, 24 h).

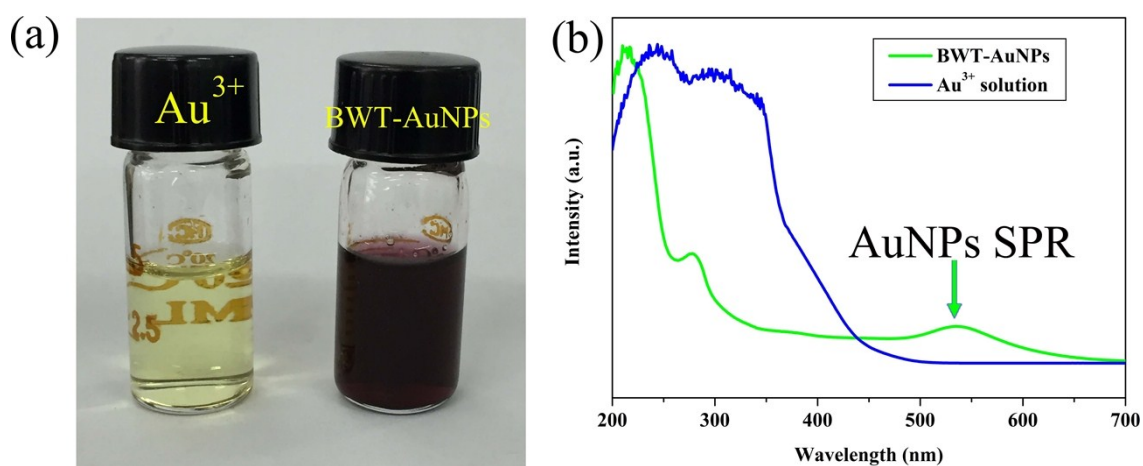

**Fig. S4.** (a) Photos and (b) Uv-vis spectra of  $\text{Au}^{3+}$  solution and BWT-AuNPs colloid solutions (5 mg BWT, 5 ml  $\text{H}_2\text{O}$ , 50  $\mu\text{mol}$   $\text{Au}^{3+}$ )
